1 **Generation of Arctic-like Rabies Viruses Containing Chimeric Glycoproteins Enables Serological Potency**

2 **Studies**

3

4 Emma M. Bentley<sup>1</sup>, Ruqiyo Ali<sup>1\*</sup>, Daniel L. Horton<sup>2</sup>, Davide Corti<sup>3,4</sup>, Ashley C. Banyard<sup>5</sup>, Anthony R. Fooks<sup>5,6</sup>  
5 and Edward Wright<sup>1\*</sup>

6

7 <sup>1</sup> Viral Pseudotype Unit, Faculty of Science and Technology, University of Westminster, 115 New Cavendish  
8 Street, London, W1W 6UW, United Kingdom.

9 <sup>2</sup> School of Veterinary Medicine, University of Surrey, Daphne Jackson Road, Guildford, Surrey,  
10 GU2 7AL, United Kingdom.

11 <sup>3</sup> Humabs BioMed SA, 6500 Bellinzona, Switzerland.

12 <sup>4</sup> Institute for Research in Biomedicine, Università della Svizzera Italiana, 6500 Bellinzona, Switzerland.

13 <sup>5</sup> Wildlife Zoonoses and Vector Borne Diseases Research Group, Animal and Plant Health Agency, New Haw,  
14 Addlestone, Surrey, KT15 3NB, United Kingdom.

15 <sup>6</sup> Institute for Infection and Immunity, St. George's Hospital Medical School, University of London, London,  
16 United Kingdom.

17

18 <sup>\*</sup> Current address: MSAT Process development MedImmune, Biopharmaceutical Development AstraZeneca,  
19 Renaissance Way, Boulevard Industry Park, Liverpool L24 9JW, United Kingdom

20

21 <sup>\*</sup> Corresponding author: Faculty of Science and Technology, University of Westminster, 115 New Cavendish  
22 Street, London, W1W 6UW, United Kingdom. Tel.: +44 (0) 20 3506 414; E-mail address:

23 [wrighte@westminster.ac.uk](mailto:wrighte@westminster.ac.uk)

24

25 *Keywords: Rabies virus, pseudotype, vaccine, antibody, post-exposure prophylaxis, glycoprotein*

26 **ABSTRACT**

27 Rabies viruses have the highest case fatality rate of any known virus and are responsible for an estimated  
28 60,000 deaths each year. This is despite the fact that there are highly efficacious vaccines and post-  
29 exposure prophylaxis available. However, while it is assumed these biologics provide protection against all  
30 rabies virus isolates, there are certain subdivisions of RABV lineages, such as within the Arctic-like RABV (AL  
31 rabies virus lineage, where data is limited and thus the potency of existing biologics has not been  
32 thoroughly assessed. By fusing the Arctic-like rabies virus envelope glycoprotein ecto- and transmembrane  
33 domains with the vesicular stomatitis virus cytoplasmic domain, a high titre ( $7.7 \times 10^5 - 6.1 \times 10^6$  RLU/ml)  
34 pseudotyped virus was generated that was subsequently used in a pseudotyped virus neutralisation assay.  
35 These results showed that Arctic-like rabies viruses are neutralised to human, canine and feline vaccines  
36 and human post-exposure prophylaxis and this was not influenced by the swapping of the cytoplasmic  
37 domains (CVS-11 vs CVS-11etmVSVc;  $r = 0.99$ ,  $p < 0.0001$ ). This study supports the concept that rabies virus  
38 vaccines and newly identified mAbs are able to neutralise rabies virus variants that cluster in a  
39 monophyletic clade, referred to as phylogroup I lyssaviruses.

40

41

42

## 43 INTRODUCTION

44 Rabies, a neglected zoonotic disease caused by members of the *Lyssavirus* genus, poses a significant public  
45 health threat with a near 100% case fatality rate in infected individuals who do not receive pre or post-  
46 exposure prophylaxes (Fooks *et al.*, 2014). Globally, rabies virus (RABV) is accountable for an estimated  
47 60,000 human deaths per year and the highest mortality rate of any other zoonotic disease when licenced  
48 vaccines and post-exposure prophylaxes are not administered (Fooks *et al.*, 2014). Serological studies,  
49 monitoring responses to pre- and post-exposure prophylaxis and undertaking widespread sero-surveillance,  
50 are vital aspects for the implementation of control programmes to lower rabies incidence (Banyard *et al.*,  
51 2013; Brookes *et al.*, 2005; Wright *et al.*, 2009). However as many rabies-endemic areas are in the  
52 developing world, countries lack the infrastructure to be able to undertake these routine serological  
53 techniques (Banyard *et al.*, 2013).

54

55 Fourteen members of the *Lyssavirus* species are classified, with RABV being the prototype species (Dietzgen  
56 *et al.*, 2011). Two putative members of the *Lyssavirus* genus remain to be characterised and officially  
57 classified, Lleida bat lyssavirus (Ceballos *et al.*, 2013) and Gannoruwa bat lyssavirus (Gunawardena *et al.*,  
58 2016). As infection with each species of the *Lyssavirus* genus causes a clinically indistinguishable disease the  
59 true burden of death from *Lyssavirus* species other than classical RABV is undefined. Arctic-like rabies  
60 viruses (AL RABV) form one of up to eight potential geographically and genetically distinct viral lineages of  
61 the RABV species (Kuzmin *et al.*, 2008; Mansfield *et al.*, 2006; Nadin-Davis *et al.*, 2007; Troupin *et al.*, 2016).  
62 Endemic across the Middle East and Asia, AL RABV is likely responsible for a significant proportion of rabies  
63 cases in these regions, which is proposed to result in greater than 20,000 human fatalities each year in India  
64 alone (Sudarshan *et al.*, 2007). Yet due to inadequate reporting systems and a weak healthcare  
65 infrastructure across this region, it is likely the true burden of rabies is far higher (Banyard *et al.*, 2013; Pant  
66 *et al.*, 2013). This lack of accurate data has led to the low prioritisation of control programmes by policy  
67 makers and public health professionals (Fooks *et al.*, 2014; Sudarshan *et al.*, 2007). Domestic dogs are the  
68 predominant transmission vector in human cases, and as the annual economic cost of canine rabies alone is  
69 estimated to be 8.6 billion USD, the economic and societal implications of endemic rabies are severe

70 (Hampson *et al.*, 2015; Pant *et al.*, 2013). Along with the implementation of control programmes to limit  
71 rabies incidence, it is also important to undertake a comprehensive analysis of currently circulating RABVs  
72 and monitor for the emergence of new variants (Matsumoto *et al.*, 2013). While there is no evidence to  
73 indicate that AL RABV has an altered pathogenicity the protection afforded by vaccines and antivirals has  
74 not been specifically addressed. Thus it is important to fully understand the public health threat posed by  
75 this AL RABV lineage.

76

77 Pseudotyped virus (PV), a replication defective viral particle acting as a surrogate for live virus, has been  
78 used in a range of applications including serological assays and as vaccine immunogens (Mather *et al.*,  
79 2013; Temperton *et al.*, 2015). The development of a PV neutralisation assay (PVNA) for the measurement  
80 of anti-rabies virus neutralising antibodies (VnAbs) in vaccine recipients, along with further large scale in-  
81 field sero-surveillance within a developing country has previously been described, providing sensitive and  
82 specific results which correlate with live virus assays and distinguishes between lyssavirus species  
83 (Temperton *et al.*, 2015; Wright *et al.*, 2008, 2009, 2010). As the use of PV allows neutralisation assays to  
84 be undertaken in biosafety level 1 or 2 laboratories, along with having a lower cost implication, the  
85 serological study of rabies can be expanded to resource-limited laboratories in regions where the virus is  
86 endemic.

87

88 While *Lyssavirus* isolates have previously pseudotyped efficiently, AL RABV pseudotypes fail to generate an  
89 adequate titre to allow use in downstream neutralisation assay studies. The flexibility of using a chimeric  
90 glycoprotein to produce recombinant, live-virus RABV has previously been demonstrated (Foley *et al.*,  
91 2000). This was further applied in a study showing pseudotyping efficiency could be increased by altering  
92 the envelope glycoprotein, replacing the cytoplasmic domain with that of a glycoprotein that pseudotypes  
93 highly effectively (Carpentier *et al.*, 2011). This study has adapted this approach to produce a chimeric AL  
94 RABV envelope glycoprotein, increasing PV titre, and undertaking PVNA to assess vaccine and antiviral  
95 efficacy against this AL RABV lineage.

96

## 97 **RESULTS**

### 98 ***Chimeric AL RABV envelope glycoprotein construction and PV titre***

99 Chimeric envelope G constructs were generated for four AL RABV isolates (RV61, RV193, RV250 and  
100 RV277), selected based on clinical significance (RV61) and reported poor growth in reference laboratory live  
101 viral cultures (RV193 and RV277; APHA, UK) and to represent three genetically distinct clades of the Arctic-  
102 related lineage (Fig. 1). The cytoplasmic domain sequence of each G was replaced with that of CVS-11 or  
103 VSV G. The ecto-transmembrane (etm) domain was not altered. A chimeric CVS-11 G sequence with a VSV  
104 G cytoplasmic domain (CVS-11etmVSVc) was produced for use as an internal control. Fig. 2 depicts the  
105 chimeric envelope G sequences generated.

106

107 Lentiviral PV comprising the wildtype and chimeric envelope G constructs were produced, packaging either  
108 an emerald green fluorescent protein (emGFP) or firefly luciferase reporter gene by transfecting HEK  
109 293T/17 cells. These were titrated onto permissive BHK-21 cells to determine the viral titres of the chimeric  
110 constructs in comparison to that achieved using wildtype envelope G. Luciferase reporter PV with a  
111 chimeric CVS-11 cytoplasmic domain envelope G caused a decrease (-15.7 fold,  $p = 0.2$ ; -10.6 fold,  $p =$   
112 0.0007; -1.4 fold,  $p = 0.7$ ) or insignificant increase (1.2 fold;  $p = 0.7$ ) in viral titre in comparison to the  
113 wildtype envelope G (Fig. 3). However, PV with a chimeric VSV cytoplasmic domain envelope G resulted in a  
114 significant increase (11.3 to 83.3 fold;  $p < 0.0005$ ) in viral titre for three of the AL RABV isolates and a small  
115 (1.1 fold;  $p = 0.3$ ) increase in viral titre for the RV250 isolate (Fig. 3).

116

117 To corroborate this observation, PV with an emGFP reporter gene were generated and used in similar  
118 infection studies. Importantly, the increase in titre was also observed by fluorescent microscopy (Fig. 4a)  
119 and the fold increase determined by flow cytometry (Fig. 4b) was in line with that observed for the  
120 luciferase reporter PV constructs.

121

### 122 ***Current vaccines and biologicals neutralise Arctic-like rabies virus***

123 The increased PV titre achieved for the AL RABV isolates using a chimeric VSV cytoplasmic domain envelope  
124 G enabled serology studies to be undertaken via a PVNA, to assess the level of sero-conversion afforded by  
125 current vaccines and post-exposure prophylaxis. The receptor-binding domain and antigenic sites of the  
126 RABV envelope G have been mapped to the ectodomain (Evans *et al.*, 2012; Kuzmina *et al.*, 2013);  
127 consequently switching the cytoplasmic domain to generate chimeric constructs should not influence the  
128 serological profile. Sequence comparison of etm domains of the AL RABV isolates and CVS-11 G shows high  
129 homology (Fig. 5). This analysis suggests the neutralisation profiles should be similar, yet as it is based on  
130 sequences alone it only serves as a crude estimate due to the disproportionate effects of individual amino  
131 acids on antigenic properties.

132

133 Initially, the chimeric envelope G PV were tested alongside wildtype CVS-11 G PV using the OIE standard  
134 reference dog serum at a concentration of 0.5 IU/ml and WHO 2<sup>nd</sup> international human anti-rabies Ig  
135 reference serum (2 IU/ml; prepared by NIBSC, UK) over a total of twelve doubling dilutions. Chimeric CVS-  
136 11etmVSVc G PV recorded an IC<sub>100</sub> titre matching (IC<sub>100</sub> = 80) or within one doubling dilution (IC<sub>100</sub> = 269) of  
137 that for wildtype CVS-11 G PV for the OIE and WHO standards respectively (Fig. 6). Further to this, all AL  
138 RABV chimeric envelope G PV were neutralised at an equivalent or more potent level by each standard  
139 than that recorded for CVS-11 G PV.

140

141 Analysis of the neutralisation afforded against these AL RABV isolates by pre-exposure vaccination was  
142 undertaken by assessing a blinded panel of serum samples taken from RABV-vaccinated humans and  
143 domestic animals (dogs and cats) vaccinated as part of the UK PETS. The samples had previously been given  
144 a titre (IU/ml) using the fluorescent antibody virus neutralisation (FAVN) test method for detecting rabies  
145 specific antibodies, a score of 0.5 IU/ml by FAVN is considered the cut-off for adequate sero-conversion for  
146 protection (Cliquet *et al.*, 1998; WHO, 2013). When un-blinded, four human serum samples (H1, H5, H6,  
147 H7) with VnAb levels of 0.03 – 0.1 IU/ml, did not neutralise any PV tested (data not shown) and one sample  
148 with a VnAb level just below 0.5 IU/ml (H61, 0.38 IU/ml) neutralised each of the PVs (Fig. 7a). All samples  
149 with a VnAb titre above 0.5 IU/ml produced high levels of neutralisation for the CVS-11 and CVS-

150 11etmVSVc G PV (IC<sub>100</sub> titres of 160-640) along with comparable levels for the AL RABV PV (Fig. 7a). The  
151 same cut-off is used to assign a satisfactory vaccination response in canine and feline recipients. All  
152 adequate animal serum samples produced a strong neutralising response (Fig. 7b). Of the four samples  
153 tested which had previously demonstrated VnAbs titres between 0.07 – 0.38 IU/ml on FAVN testing (Fig.  
154 7b; PET-5531,-5545,-5734,-5896) a low level of PV neutralisation was detected (IC<sub>100</sub> titres of 12-57).

155

156 Biologics used for post-exposure prophylaxis (PEP) were shown to effectively neutralise all AL RABV PV.  
157 Human rabies immunoglobulin (HRIG) samples were tested with a starting concentration of 2 IU/ml, each  
158 sample provided a potent level of neutralisation (Fig. 7c). Monoclonal antibody preparations, directed  
159 against various neutralising antigenic sites on the RABV envelope G and being considered for development  
160 to replace HRIG in PEP (Bakker *et al.*, 2005), were used at a starting concentration of 15 µg/ml. Each mAb  
161 neutralised the AL RABV isolates (IC<sub>100</sub> titre of 1.1 – 662.3 ng/ml), with CR4098 and RVC20 offering the most  
162 potent levels of neutralisation across all PV preparations (IC<sub>100</sub> titres between 1.1 – 35.6 and 1.3 – 106.9  
163 ng/ml respectively; Fig. 7d).

164

165 The influence of switching the cytoplasmic domain on the neutralisation profile was also assessed by  
166 correlating IC<sub>100</sub> titres obtained by PVNA for wildtype CVS-11 G PV alongside those for chimeric CVS-  
167 11etmVSVc G PV (Fig. 8). A strong correlation was shown between the PVNA results ( $r = 0.99$ ,  $p < 0.0001$   
168 [Pearson's correlation]) thus switching the cytoplasmic domain does not alter the antigenicity of the  
169 envelope G.

170

171

172 **DISCUSSION**

173 Serological studies are required to define VnAb titres as part of vaccination and antiviral development and  
174 treatment schedules, while also allowing surveillance of the epidemiological spread of emerging viruses. As  
175 PV incorporate envelope proteins identical to the wildtype virus in their envelope they are antigenically  
176 similar, mimic the action of live virus in neutralisation tests and have proven to be a safe, robust and  
177 flexible alternative for use in serological assays (Mather *et al.*, 2013; Temperton *et al.*, 2015). The PVNA can  
178 be undertaken in containment level 1 and 2 laboratories as it does not require the handling of live virus, as  
179 opposed to other rabies virus neutralisation tests. The range of reporter genes and removal of the need for  
180 cold-chain storage make the PVNA an accessible and lower cost alternative to conventional techniques.  
181 Further to this, using a CVS-11 G PV, the PVNA proved to be 100% specific and equally sensitive to the WHO  
182 and OIE endorsed FAVN method of rabies VnAb detection (Wright *et al.*, 2008, 2009). This study further  
183 substantiates its use by demonstrating the inherent flexibility of the platform, allowing manipulation of the  
184 envelope G to increase PV titre, permitting serological studies to determine the protection conferred by  
185 vaccines and antivirals against AL RABV isolates. While the PVNA is primarily a research tool at this time, it  
186 has previously been used in clinical trials to assess vaccines (Ewer *et al.*, 2016; Ledgerwood *et al.*, 2010).

187

188 Chimeric AL RABV envelope G sequences were constructed with either a CVS-11 or VSV G cytoplasmic  
189 domain in an attempt to increase PV titre. Both CVS-11 and VSV G routinely produce high titre PV. Only the  
190 chimeric VSV cytoplasmic domain envelope G resulted in a significant increase in PV titre for three of the AL  
191 RABV isolates. The lower increase in titre for the RV250 isolate is thought to be attributed to a difference in  
192 its glycoprotein structure, phylogenetic analysis showed greater sequence homology between the other  
193 isolates which formed a separate cluster. Previously, the use of a chimeric CVS (B2c strain) envelope G with  
194 a VSV cytoplasmic domain was described (Carpentier *et al.*, 2011), reporting a two fold increase in titre;  
195 matching that observed for the CVS-11etmVSVc G used within this study. The mechanism behind this effect  
196 remains to be fully elucidated, yet several studies have described that the assembly of viable virions  
197 requires a direct or indirect interaction between the lentiviral matrix protein and envelope protein  
198 cytoplasmic domain (Cosson, 1996; Freed, 1998; Sandrin *et al.*, 2004; Yu *et al.*, 1992). Thus it is possible the



199 cytoplasmic domain of VSV G interacts more effectively with the lentiviral matrix protein compared to that  
200 of CVS-11 G. Alternatively, it has been suggested a truncated or shorter cytoplasmic domain, as with VSV G,  
201 may cause a reduced steric hindrance or allow incorporation into lentiviral particles independent of matrix  
202 protein interaction (Freed & Martin, 1995). This is further supported by the report that truncation of the  
203 measles virus fusion (F) protein cytoplasmic domain lead to an increased PV titre (Frecha *et al.*, 2008).  
204  
205 Importantly, the regions of the VSV G defined within the literature differ due to the predictive nature of  
206 structural models. In this study, the VSV G cytoplasmic domain followed that used by Carpentier *et al.*  
207 (2011), as defined by Roche *et al.* (2006). However, caution is needed when designing chimeric sequences  
208 as alterations to some regions may result in loss of function, in particular the transmembrane domain  
209 which is involved in viral fusion and has more variability in the reported sequence (Cleverley & Lenard,  
210 1998).  
211  
212 While current vaccines provide protection against RABV, the high level of sequence identity between the AL  
213 RABV isolates and CVS-11 G is not sufficient to definitively predict their neutralisation profile, as the effect  
214 of individual amino acid substitutions on antigenic variation has in some cases proven substantial (Horton  
215 *et al.*, 2010). Also, with the advent of mAbs for PEP, point mutations within the binding sites of mAbs can  
216 result in viral escape from neutralisation and thus the identification of these critical residues, assessing the  
217 neutralisation of generated escape viruses, forms a vital aspect in the development of effective, broadly  
218 neutralising, therapeutics (Bakker *et al.*, 2005; Marissen *et al.*, 2005). Direct measures of antigenic  
219 variation by serology are fundamental yet can prove difficult to quantify. The use of antigenic cartography  
220 has added power to the interpretation of antigenic data, enabling the generation of an antigenic map for a  
221 global panel of lyssaviruses, instrumental for predicting antigenicity based on the envelope G gene  
222 sequence (Horton *et al.*, 2010). The PVNA platform has previously been used in the collection of antigenic  
223 data in a cross-species comparison of lyssavirus neutralisation, showing suitability as a high-throughput  
224 screening method to complement quantification of antigenic differences (Wright *et al.*, 2008, 2009). This  
225 study further supports use of the PVNA, demonstrating inherent flexibility in the creation of chimeric viral

226 envelope protein PV without disruption to the neutralisation profile and therefore the envelope protein  
227 function. This enabled confirmation of sero-conversion, and by extrapolation, protection afforded by  
228 current vaccines and prophylaxis against the AL RABV isolates.

229

230 The AL RABV isolates were found to be effectively neutralised by human and mammalian serum samples,  
231 conferring adequate protection by current pre-exposure vaccine formulations. As more than 99% of human  
232 rabies cases occur following contact with rabid dogs, the control of rabies within this population is of high  
233 priority (Banyard *et al.*, 2013; WHO, 2013). Mass vaccination campaigns targeting dog populations are  
234 highly effective and thus monitoring levels of protection afforded by animal vaccine formulations is of equal  
235 importance to the prevention of human rabies infections. All licenced vaccine preparations are derived  
236 from inactivated preparations of classical RABV, which has shown to confer protection against viruses in  
237 phylogroup I but offer limited or no protection against those in phylogroups II and III (Evans *et al.*, 2012;  
238 Fooks, 2004; Hanlon *et al.*, 2005). Since AL RABV is a lineage of classical RABV, the protection observed  
239 follows this accepted consensus and therefore, even though the isolates of rabies causing cases in the  
240 regions where AL RABV circulate are not fully characterised, unexplained vaccine failures have not been  
241 reported. However, due to poor growth of these AL RABV isolates in live viral cultures, which could suggest  
242 a different structure of the G protein, and the implication of one isolate in a transplant-associated rabies  
243 outbreak in Germany (Ross *et al.*, 2015), it was important to be able to undertake serological evaluation.  
244 Further studies into cross-protection of rabies vaccines against more divergent lyssaviruses, such as those  
245 within phylogroups II and III, using this PVNA could assist in the development of a more broadly cross  
246 reactive vaccine formulation.

247

248 PEP regimes have long been effective in preventing rabies virus infection in the event of exposure. For  
249 previously un-vaccinated individuals this consists of wound cleansing, vaccination and the administration of  
250 rabies immunoglobulin (RIG) to provide passive immunity in the interval before vaccine induced active  
251 immunity is achieved (Fooks *et al.*, 2014). RIG of human (H) or equine (E) origin is available. While HRIG is  
252 preferred due to its longer half-life, it is expensive compared to the more immunogenic ERIG, which limits

253 its use in the developing world; yet both are in short supply (WHO, 2013). The AL RABV isolates were  
254 neutralised by all HRIG preparations, however alternative means of PEP are now being sought by the  
255 development of mAb cocktails. Here we tested four mAbs, RVC20 and CR57, and RVC58 and CR4098, which  
256 target antigenic site I and III respectively of the RABV G (Bakker *et al.*, 2005; De Benedictis *et al.*, 2016;  
257 Marissen *et al.*, 2005). In order to meet WHO guidelines, which suggest RABV PEP should contain at least  
258 two antibodies to lower the probability of immune escape, CR57 and CR4098 have been combined into the  
259 CL184 mAb cocktail and undergone phase II clinical trials (Bakker *et al.*, 2008; Nagarajan *et al.*, 2014; WHO,  
260 2013). In this study, each mAb effectively neutralised the AL RABV isolates, which can further serve as an  
261 indication that both antigenic sites are highly conserved across the AL RABV lineage.

262

263 Ultimately, the flexibility of using PV demonstrated within this study can be further extended. The  
264 generation of antigenic escape mutant envelope protein for incorporation into the PV platform will enable  
265 evaluation of mAb cocktails undergoing development. Likewise, switching of epitopes between lyssavirus  
266 envelope G can allow further cross neutralisation studies to be undertaken, an important aspect in vaccine  
267 design. The ability to switch domains of the lyssavirus envelope G has already been explored, highlighting  
268 the potential for use in antigenic studies (Jallet *et al.*, 1999). This will enable the level of protection afforded  
269 against other divergent lyssaviruses in phylogroup II and III to be evaluated, of great interest from a public  
270 health perspective due to their unknown disease burden.

271

272 Using the approach of generating a chimeric envelope glycoprotein with a VSV cytoplasmic domain resulted  
273 in high titre PV without affecting their neutralisation profile. These data also provide further evidence of  
274 the flexibility pseudotyped virus-based assays provide when undertaking serological studies of highly  
275 pathogenic viruses. In conclusion, it was determined the AL RABV isolates are neutralised by available  
276 vaccines and post-exposure prophylaxis.

277

278 **METHODS**

279 ***Cell lines***

280 Human embryonic kidney 293T clone-17 cells (HEK 293T/17; ATCC CRL-11268) were used for PV production  
281 and subsequent titration and PVNA were undertaken using baby hamster kidney-21 clone-13 cells (BHK-21;  
282 ATCC CCL-10). Both cell lines were cultured in Dulbecco's Modified Eagle Medium (DMEM) supplemented  
283 with 10% foetal calf serum (FCS) and 1% penicillin/streptomycin with 5% CO<sub>2</sub>.

284

285 ***Viruses and cloning of chimeric envelope glycoprotein***

286 The four AL RABV envelope glycoprotein (G) genes used in this study were amplified from viral RNA of  
287 India.human.87.RV61 (KU534939), Pakistan.dog.89.RV193 (KU534940), Russia.squirrel.RV250 (KU534941)  
288 and Pakistan.goat.RV277 (KU534942) and cloned into the pl.18 expression vector (Cox *et al.*, 2002). The  
289 challenge virus standard-11 (CVS-11) (Wright *et al.*, 2008) and vesicular stomatitis virus (VSV; a gift from  
290 Didier Trono, Adgene plasmid # 12259) G genes have previously been described and were used to produce  
291 control pseudotyped virus in this study.

292

293 Chimeric envelope G were generated by overlap extension polymerase chain reaction (PCR) (Heckman &  
294 Pease, 2007). Specific primers, designed based on the envelope G gene sequences, were used to separately  
295 amplify DNA fragments encoding the ecto- and transmembrane domain (etm) and cytoplasmic domain (c)  
296 portions of the chimeric constructs using the proofreading enzyme AccuPrime *Pfx* SuperMix (Life  
297 Technologies, UK). Primers are listed in Table S1. A further PCR was used to bring the entire open reading  
298 frame together utilising the overlapping complementary regions initially introduced. Once amplified,  
299 unique restriction sites introduced by the primers at the 5' and 3' ends were used to clone the chimeric  
300 sequences into the pl.18 expression plasmid. Clones containing the correct insert were identified by  
301 restriction enzyme digest and confirmed by Sanger sequencing.

302

303 ***Pseudotyped virus production and titration***

304 Lentiviral pseudotyped virus production followed the transfection protocol previously described (Wright *et*  
305 *al.*, 2009). Briefly, the HIV *gag-pol* construct p8.91 and firefly luciferase reporter construct pCSFLW or  
306 emerald green fluorescent protein (emGFP) reporter construct pCSemGW (kindly provided by University  
307 College London (UCL), UK) (Cubitt *et al.*, 1998) were transfected concurrently with plasmid expressing the  
308 appropriate envelope G into HEK 293T/17 cells using Fugene-6 (Promega, UK) or polyethylenimine (PEI)  
309 (Sigma, UK) transfection reagent. Supernatant was harvested 48 and 72h post-transfection and filtered  
310 through a 0.45µm filter, storing long-term at -80°C.

311

312 Titration of pseudotyped virus aliquots carrying the firefly luciferase reporter gene was performed by  
313 transducing BHK-21 cells in a 96-well plate ( $2 \times 10^4$  cells/well) with serially diluted pseudotype supernatant  
314 in quadruplicate. Following 48h incubation, cell luminescence was read using the Bright-Glo assay  
315 (Promega, UK) and GloMax-Multi+ microplate luminometer (Promega, UK) with titres expressed as relative  
316 luminescence units per ml (RLU/ml) or 50% tissue culture infective dose per ml (TCID<sub>50</sub>/ml). Likewise,  
317 titration of virus with emGFP reporter gene involved transducing BHK-21 cells in duplicate with doubling  
318 dilutions of pseudotype supernatant. emGFP positive cells were visualised using a fluorescent microscope  
319 and counted using a Dako CyAn ADP cytometer (Beckman Coulter, UK).

320

### 321 ***Serum and mAb samples***

322 The World Organisation for Animal Health (OIE) standard dog reference serum at a concentration of 0.5  
323 international units per ml (IU/ml) and WHO 2<sup>nd</sup> international human anti-rabies Ig reference serum (2  
324 IU/ml; prepared by National Institute for Biological Standards and Control (NIBSC), UK) were used as  
325 positive controls. A range of sera (n=20) from RABV-vaccinated humans (Rabipur, Novartis) and dogs and  
326 cats (Rabvac, Fort Dodge; Nobivac, Intervet; Rabisin, Merial; Quantum, Schering Plough) enrolled in the UK  
327 pet travel scheme (PETS) were used (Ramnial *et al.*, 2010). Human monoclonal antibody (mAb) samples  
328 were produced as described in (De Benedictis *et al.*, 2016) and commercial rabies immunoglobulin (RIG)  
329 released for the European market were kindly provided by NIBSC, UK.

330

331 All samples were titrated in 2-fold serial dilutions. All experiments were undertaken at least in duplicate,  
332 where the titre varied by more than one doubling dilution it was repeated and the geometric mean  
333 recorded, as per standard serological practice (Bresson *et al.*, 2006).

334

#### 335 ***Neutralisation assays***

336 The pseudotyped virus TCID<sub>50</sub> value was calculated using the end point method (Condit, 2001). In a 96-well  
337 plate 50 x TCID<sub>50</sub> pseudotyped virus was incubated with sera in duplicate for 1 hr at 37°C (5% CO<sub>2</sub>) before  
338 the addition of 1 x 10<sup>4</sup> BHK-21 cells. After a further 48 hrs incubation cell media was removed and a 50:50  
339 mix of Bright-Glo reagent (Promega, UK) and fresh media added. Luciferase activity was detected on a  
340 GloMax-Multi+ microplate luminometer (Promega, UK) and IC<sub>100</sub> end-point titres recorded.

341

#### 342 ***Phylogenetic analysis***

343 Analysis of 96 RABV glycoprotein sequences (1575 nucleotides) was inferred using MEGA6, with a GTR  
344 substitution model, gamma distribution of rate variation sites a proportion of invariant sites (GTR+G+I).  
345 Established lineages were illustrated and all except the Arctic-related viruses collapsed for clarity. Bootstrap  
346 values (100 replicates) were illustrated at key nodes.

347 **ACKNOWLEDGEMENTS**

348 We thank Greg Towers (UCL) for providing the pCSemGW plasmid and Giada Mattiuzzo (NIBSC) for  
349 supplying the RIG samples used within this study. This work was supported by the Department for  
350 Environment Food and Rural Affairs (Defra); Scottish Government and Welsh Government (grant number  
351 SE0431).

352

353 **CONFLICTS OF INTEREST**

354 Davide Corti is employed by Humabs Biomed, which is developing rabies monoclonal antibodies. Ruqiyu Ali  
355 undertook this work while an MSc student at the University of Westminster but has since taken up  
356 employment at AstraZeneca.

357

358 REFERENCES

- 359 **Bakker, A. B. H., Python, C., Kissling, C. J., Pandya, P., Marissen, W. E., Brink, M. F., Lagerwerf, F., Worst,**  
360 **S., van Corven, E. & other authors. (2008).** First administration to humans of a monoclonal antibody  
361 cocktail against rabies virus: Safety, tolerability, and neutralizing activity. *Vaccine* **26**, 5922–5927.
- 362 **Bakker, A. B. H., Marissen, W. E., Arjen, R., Rice, A. B., Weldon, W. C., Niezgodá, M., Hanlon, C. a, Thijsse,**  
363 **S., Backus, H. H. J. & other authors. (2005).** Novel Human Monoclonal Antibody Combination  
364 Effectively Neutralizing Natural Rabies Virus Variants and Individual In Vitro Escape Mutants Novel  
365 Human Monoclonal Antibody Combination Effectively Neutralizing Natural Rabies Virus Variants and  
366 Individual In. *J Virol* **79**, 9062–9068.
- 367 **Banyard, A. C., Horton, D. L., Freuling, C., Müller, T. & Fooks, A. R. (2013).** Control and prevention of  
368 canine rabies: the need for building laboratory-based surveillance capacity. *Antiviral Res* **98**, 357–64.  
369 Elsevier B.V.
- 370 **Banyard, A. C. & Fooks, A. R. (2017).** The impact of novel lyssavirus discovery. *Microbiol Aust* **38**, 17–21.
- 371 **De Benedictis, P., Minola, A., Nodari, E. R., Aiello, R., Zecchin, B., Salomoni, A., Foglierini, M., Agatic, G.,**  
372 **Vanzetta, F. & other authors. (2016).** Development of broad-spectrum human monoclonal antibodies  
373 for rabies post-exposure prophylaxis. *EMBO Mol Med* **8**, 407–421.
- 374 **Bresson, J.-L., Perronne, C., Launay, O., Gerdil, C., Saville, M., Wood, J., Höschler, K. & Zambon, M. C.**  
375 **(2006).** Safety and immunogenicity of an inactivated split-virion influenza A/Vietnam/1194/2004  
376 (H5N1) vaccine: phase I randomised trial. *Lancet* **367**, 1657–64.
- 377 **Brookes, S. M., Parsons, G., Johnson, N., McElhinney, L. M. & Fooks, a R. (2005).** Rabies human diploid  
378 cell vaccine elicits cross-neutralising and cross-protecting immune responses against European and  
379 Australian bat lyssaviruses. *Vaccine* **23**, 4101–9.
- 380 **Carpentier, D. C. J., Vevis, K., Trabalza, A., Georgiadis, C., Ellison, S. M., Asfahani, R. I. & Mazarakis, N. D.**  
381 **(2011).** Enhanced pseudotyping efficiency of HIV-1 lentiviral vectors by a rabies/vesicular stomatitis  
382 virus chimeric envelope glycoprotein. *Gene Ther* **19**, 761–74. Nature Publishing Group.
- 383 **Ceballos, N. A., Morón, S. V., Berciano, J. M., Nicolás, O., López, C. A., Juste, J., Nevado, C. R., Setién, Á. A.**  
384 **& Echevarría, J. E. (2013).** Novel lyssavirus in bat, Spain. *Emerg Infect Dis* **19**, 793–795.
- 385 **Cleverley, D. Z. & Lenard, J. (1998).** The transmembrane domain in viral fusion: essential role for a  
386 conserved glycine residue in vesicular stomatitis virus G protein. *Proc Natl Acad Sci U S A* **95**, 3425–  
387 3430.
- 388 **Cliquet, F., Aubert, M. & Sagné, L. (1998).** Development of a fluorescent antibody virus neutralisation test  
389 (FAVN test) for the quantitation of rabies-neutralising antibody. *J Immunol Methods* **212**, 79–87.
- 390 **Condit, R. C. (2001).** Principles of Virology. In *Fields Virol*, 4th edn., pp. 19–51. Edited by D. M. Knipe & P. M.  
391 Howley. Philadelphia: Lippincott Williams & Wilkins.
- 392 **Cosson, P. (1996).** Direct interaction between the envelope and matrix proteins of HIV-1. *EMBO J* **1**, 5783–  
393 5788.
- 394 **Cox, R. J., Mykkeltvedt, E., Robertson, J. & Haaheim, L. R. (2002).** Non-lethal viral challenge of influenza  
395 haemagglutinin and nucleoprotein DNA vaccinated mice results in reduced viral replication. *Scand J*  
396 *Immunol* **55**, 14–23.
- 397 **Cubitt, A. B., Woollenweber, L. a & Heim, R. (1998).** Understanding Structure-Function Relationships in the  
398 *Aequorea victoria* Green Fluorescent Protein. *Methods Cell Biol* **58**, 19–30.
- 399 **Dietzgen, R. G., Calisher, C. H., Kurath, G., Kuzmin, I. V., Rodriguez, L. L., Stone, D. M., Tesh, R. B., Tordo,**  
400 **N., Walker, P. J. & other authors. (2011).** Rhabdoviridae. In *Virus Taxon Ninth Rep Int Comm Taxon*  
401 *Viruses*. Edited by M. J. A. Andrew, M. Q. King, E. B. Carstens & E. J. Lefkowitz. Oxford, UK: Elsevier.



- 402 **Evans, J. S., Horton, D. L., Easton, A. J., Fooks, A. R. & Banyard, A. C. (2012).** Rabies virus vaccines: is there  
403 a need for a pan-lyssavirus vaccine? *Vaccine* **30**, 7447–54. Elsevier Ltd.
- 404 **Ewer, K., Rampling, T., Venkatraman, N., Bowyer, G., Wright, D., Lambe, T., Imoukhuede, E. B., Payne, R.,**  
405 **Fehling, S. K. & other authors. (2016).** A Monovalent Chimpanzee Adenovirus Ebola Vaccine Boosted  
406 with MVA. *N Engl J Med* **374**, 1635–1646.
- 407 **Foley, H. D., McGettigan, J. P., Siler, C. a, Dietzschold, B. & Schnell, M. J. (2000).** A recombinant rabies  
408 virus expressing vesicular stomatitis virus glycoprotein fails to protect against rabies virus infection.  
409 *Proc Natl Acad Sci U S A* **97**, 14680–14685.
- 410 **Fooks, A. (2004).** The challenge of new and emerging lyssaviruses. *Expert Rev Vaccines* **3**, 333–6.
- 411 **Fooks, A. R., Banyard, A. C., Horton, D. L., Johnson, N., McElhinney, L. M. & Jackson, A. C. (2014).** Current  
412 status of rabies and prospects for elimination. *Lancet* **6736**, 1–11. Elsevier Ltd.
- 413 **Frecha, C., Costa, C., Nègre, D., Gauthier, E., Russell, S. J., Cosset, F.-L. & Verhoeyen, E. (2008).** Stable  
414 transduction of quiescent T cells without induction of cycle progression by a novel lentiviral vector  
415 pseudotyped with measles virus glycoproteins. *Blood* **112**, 4843–52.
- 416 **Freed, E. O. (1998).** HIV-1 gag proteins: diverse functions in the virus life cycle. *Virology* **251**, 1–15.
- 417 **Freed, E. O. & Martin, M. a. (1995).** Virion incorporation of envelope glycoproteins with long but not short  
418 cytoplasmic tails is blocked by specific, single amino acid substitutions in the human  
419 immunodeficiency virus type 1 matrix. *J Virol* **69**, 1984–1989.
- 420 **Gunawardena, P. S., Marston, D. A., Ellis, R. J., Wise, E. L., Karawita, A. C., Breed, A. C., Mcelhinney, L. M.,**  
421 **Johnson, N., Banyard, A. C. & Fooks, A. R. (2016).** Lyssavirus in Indian Flying Foxes , Sri Lanka. *Emerg*  
422 *Infect Dis* **22**, 8–11.
- 423 **Hampson, K., Coudeville, L., Lembo, T., Sambo, M., Kieffer, A., Attlan, M., Barrat, J., Blanton, J. D., Briggs,**  
424 **D. J. & other authors. (2015).** Estimating the Global Burden of Endemic Canine Rabies. *PLoS Negl Trop*  
425 *Dis* **9**, e0003709.
- 426 **Hanlon, C. A., Kuzmin, I. V, Blanton, J. D., Weldon, W. C., Manangan, J. S. & Rupprecht, C. E. (2005).**  
427 Efficacy of rabies biologics against new lyssaviruses from Eurasia. *Virus Res* **111**, 44–54.
- 428 **Heckman, K. L. & Pease, L. R. (2007).** Gene splicing and mutagenesis by PCR-driven overlap extension. *Nat*  
429 *Protoc* **2**, 924–32.
- 430 **Horton, D. L., McElhinney, L. M., Marston, D. a, Wood, J. L. N., Russell, C. a, Lewis, N., Kuzmin, I. V,**  
431 **Fouchier, R. a M., Osterhaus, a D. M. E. & other authors. (2010).** Quantifying antigenic relationships  
432 among the lyssaviruses. *J Virol* **84**, 11841–8.
- 433 **Jallet, C., Jacob, Y., Bahloul, C., Drings, a, Desmezieres, E., Tordo, N. & Perrin, P. (1999).** Chimeric  
434 lyssavirus glycoproteins with increased immunological potential. *J Virol* **73**, 225–233.
- 435 **Kuzmin, I. V, Hughes, G. J., Botvinkin, a D., Gribencha, S. G. & Rupprecht, C. E. (2008).** Arctic and Arctic-  
436 like rabies viruses: distribution, phylogeny and evolutionary history. *Epidemiol Infect* **136**, 509–19.
- 437 **Kuzmina, N., Kuzmin, I. V, Ellison, J. A. & Rupprecht, C. E. (2013).** Conservation of Binding Epitopes for  
438 Monoclonal Antibodies on the Rabies Virus Glycoprotein. *J Antivir Antiretrovir* **5**, 37–43.
- 439 **Ledgerwood, J. E., Costner, P., Desai, N., Holman, L., Enama, M. E., Yamshchikov, G., Mulangu, S., Hu, Z.,**  
440 **Andrews, C. A. & other authors. (2010).** A replication defective recombinant Ad5 vaccine expressing  
441 Ebola virus GP is safe and immunogenic in healthy adults. *Vaccine* **29**, 304–313.
- 442 **Mansfield, K. L., Racloz, V., McElhinney, L. M., Marston, D. A., Johnson, N., R??nsholt, L., Christensen, L.**  
443 **S., Neuvonen, E., Botvinkin, A. D. & other authors. (2006).** Molecular epidemiological study of Arctic  
444 rabies virus isolates from Greenland and comparison with isolates from throughout the Arctic and  
445 Baltic regions. *Virus Res* **116**, 1–10.

- 446 **Marissen, W. E., Kramer, R. A., Rice, A., Weldon, W. C., Niezgod, M., Faber, M., Sloomstra, J. W., Meloen,**  
447 **R. H., Clijsters-van der Horst, M. & other authors. (2005).** Novel rabies virus-neutralizing epitope  
448 recognized by human monoclonal antibody: fine mapping and escape mutant analysis. *J Virol* **79**,  
449 4672–4678.
- 450 **Mather, S., Scott, S., Temperton, N., Wright, E., King, B. & Daly, J. (2013).** Current progress with serological  
451 assays for exotic emerging/re-emerging viruses. *Future Virol* **8**, 745–755.
- 452 **Matsumoto, T., Ahmed, K., Karunanayake, D., Wimalaratne, O., Nanayakkara, S., Perera, D., Kobayashi,**  
453 **Y. & Nishizono, A. (2013).** Molecular epidemiology of human rabies viruses in Sri Lanka. *Infect Genet*  
454 *Evol* **18**, 160–7. Elsevier B.V.
- 455 **Nadin-Davis, S. a, Turner, G., Paul, J. P. V, Madhusudana, S. N. & Wandeler, A. I. (2007).** Emergence of  
456 Arctic-like rabies lineage in India. *Emerg Infect Dis* **13**, 111–6.
- 457 **Nagarajan, T., Marissen, W. E. & Rupprecht, C. E. (2014).** Monoclonal antibodies for the prevention of  
458 rabies: theory and clinical practice. *Antib Technol J* **4**, 1–12.
- 459 **Pant, G. R., Lavenir, R., Wong, F. Y. K., Certoma, A., Larrous, F., Bhatta, D. R., Bourhy, H., Stevens, V. &**  
460 **Dacheux, L. (2013).** Recent emergence and spread of an Arctic-related phylogenetic lineage of rabies  
461 virus in Nepal. *PLoS Negl Trop Dis* **7**, e2560.
- 462 **Ramnial, V., Kosmider, R., Aylan, O., Freuling, C., Müller, T. & Fooks, a R. (2010).** Quantitative risk  
463 assessment to compare the risk of rabies entering the UK from Turkey via quarantine, the Pet Travel  
464 Scheme and the EU Pet Movement Policy. *Epidemiol Infect* **138**, 1114–1125.
- 465 **Roche, S., Bressanelli, S., Rey, F. & Gaudin, Y. (2006).** Crystal Structure of the Low-pH Form of the Vesicular  
466 Stomatitis Virus Glycoprotein G. *Science* **313**, 187–192.
- 467 **Ross, R. S., Wolters, B., Hoffmann, B., Geue, L., Viazov, S., Grüner, N., Roggendorf, M. & Müller, T. (2015).**  
468 Instructive even after a decade: Complete results of initial virological diagnostics and re-evaluation of  
469 molecular data in the German rabies virus ‘outbreak’ caused by transplantations. *Int J Med Microbiol*  
470 **305**, 636–643. Elsevier GmbH.
- 471 **Sandrin, V., Muriaux, D., Darlix, J. & Inserm, U. (2004).** Intracellular Trafficking of Gag and Env Proteins and  
472 Their Interactions Modulate Pseudotyping of Retroviruses. *J Virol* **78**, 7153–7164.
- 473 **Sudarshan, M. K., Madhusudana, S. N., Mahendra, B. J., Rao, N. S. N., Ashwath Narayana, D. H., Abdul**  
474 **Rahman, S., Meslin, F.-X., Lobo, D., Ravikumar, K. & Gangaboraiah. (2007).** Assessing the burden of  
475 human rabies in India: results of a national multi-center epidemiological survey. *Int J Infect Dis* **11**, 29–  
476 35.
- 477 **Temperton, N. J., Wright, E. & Scott, S. D. (2015).** Retroviral Pseudotypes – from scientific tools to clinical  
478 utility. *Encycl Life Sci* 1–21.
- 479 **Troupin, C., Dacheux, L., Tanguy, M., Sabeta, C., Holmes, E. C., Bouchier, C., Vignuzzi, M., Duchene, S.,**  
480 **Holmes, E. & Bourhy, H. (2016).** Large-Scale Phylogenomic Analysis Reveals the Complex Evolutionary  
481 History of Rabies Virus in Multiple Carnivore Hosts. *PLoS Pathog* **12**, e1006041.
- 482 **WHO. (2013).** *WHO Expert Consultation on Rabies - Second Report*. Geneva.
- 483 **Wright, E., Temperton, N. J., Marston, D. A., McElhinney, L. M., Fooks, A. R. & Weiss, R. A. (2008).**  
484 Investigating antibody neutralization of lyssaviruses using lentiviral pseudotypes: a cross-species  
485 comparison. *J Gen Virol* **89**, 2204–13.
- 486 **Wright, E., McNabb, S., Goddard, T., Horton, D. L., Lembo, T., Nel, L. H., Weiss, R. a, Cleaveland, S. &**  
487 **Fooks, A. R. (2009).** A robust lentiviral pseudotype neutralisation assay for in-field serosurveillance of  
488 rabies and lyssaviruses in Africa. *Vaccine* **27**, 7178–86.
- 489 **Wright, E., Hayman, D. T. S., Vaughan, A., Temperton, N. J., Wood, J. L. N., Cunningham, A. A., Suu-Ire, R.,**  
490 **Weiss, R. A. & Fooks, A. R. (2010).** Virus neutralising activity of African fruit bat (*Eidolon helvum*) sera

491            against emerging lyssaviruses. *Virology* **408**, 183–9. Elsevier Inc.

492    **Yu, X., Yuan, X., Matsuda, Z., Lee, T. H. & Essex, M. (1992).** The matrix protein of human immunodeficiency  
493    virus type 1 is required for incorporation of viral envelope protein into mature virions. *J Virol* **66**,  
494    4966–4971.

495

496

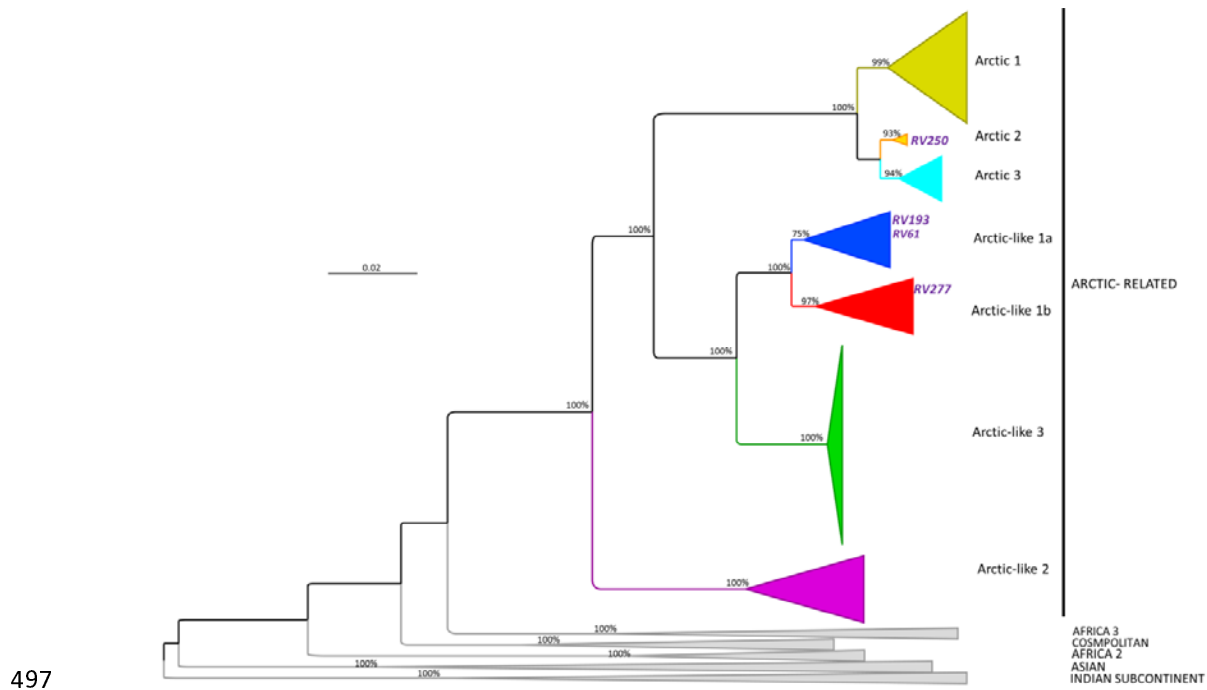

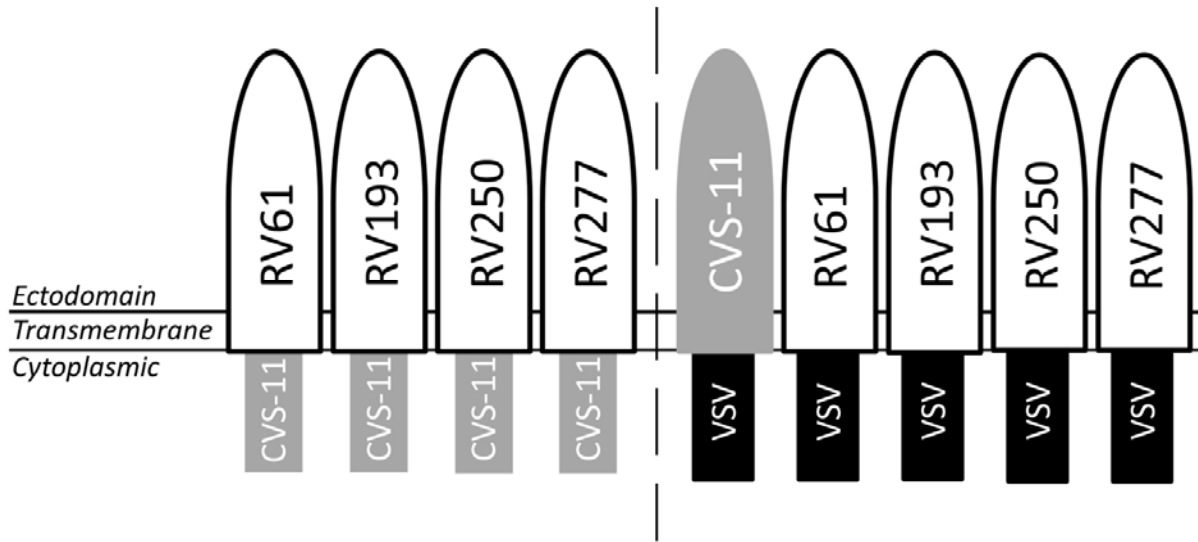

503

504 **Fig. 2. Schematic of the chimeric envelope glycoprotein constructs generated.** AL RABV and CVS-11 ecto-

505 transmembrane domains span from amino acid 1-480 of the full length G and the CVS-11 cytoplasmic

506 domain from amino acid 481-526. The VSV G cytoplasmic domain used was amino acids 483-512.

507

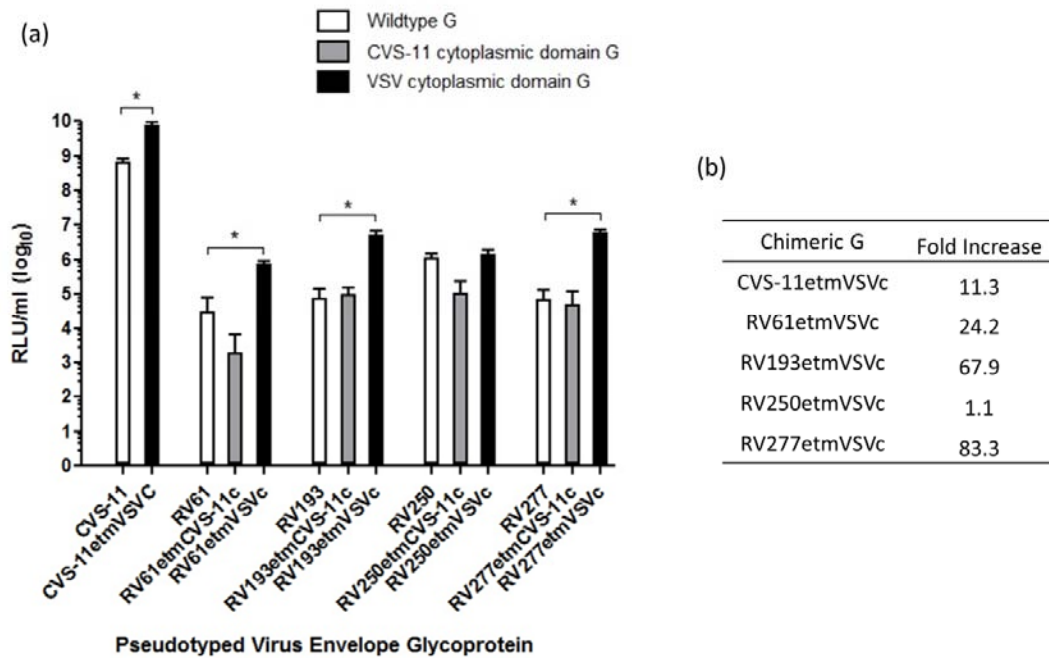

508

509 **Fig. 3. Comparison of viral titres using wildtype and chimeric envelope glycoproteins.** (a) Aliquots of PV  
 510 with a luciferase reporter gene were titrated on BHK cells to determine if a chimeric envelope glycoprotein  
 511 with a CVS-11 or VSV cytoplasmic domain (CVS-11c or VSVc) increased titre, measured in relative light units  
 512 per ml (RLU/ml) (\* $p < 0.0005$ ; two-tailed  $t$ -test). Error bars show SD. (b) Fold increase in viral titre  
 513 calculated from RLU/ml in (a) for chimeric VSVc G PV compared to wildtype G PV.

514

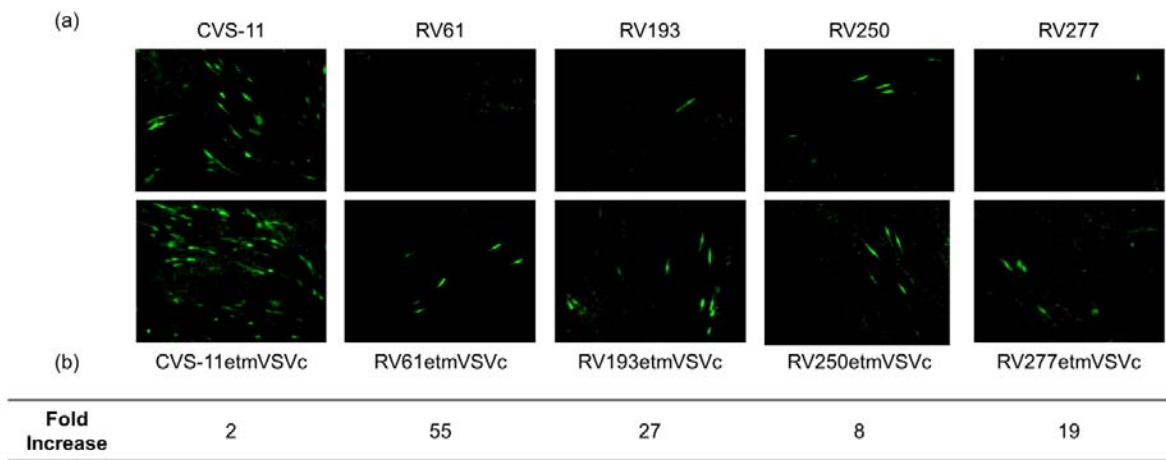

515

516 **Fig. 4. Viral titre comparison of PV bearing chimeric envelope glycoprotein and carrying an emGFP**

517 **reporter gene.** (a) Fluorescent micrographs of BHK cells infected with wildtype or chimeric VSVc G PV. (b)

518 Fold increase in viral titre comparing chimeric VSVc G PV to wildtype stocks used in (a), determined by flow

519 cytometry analysis.

520

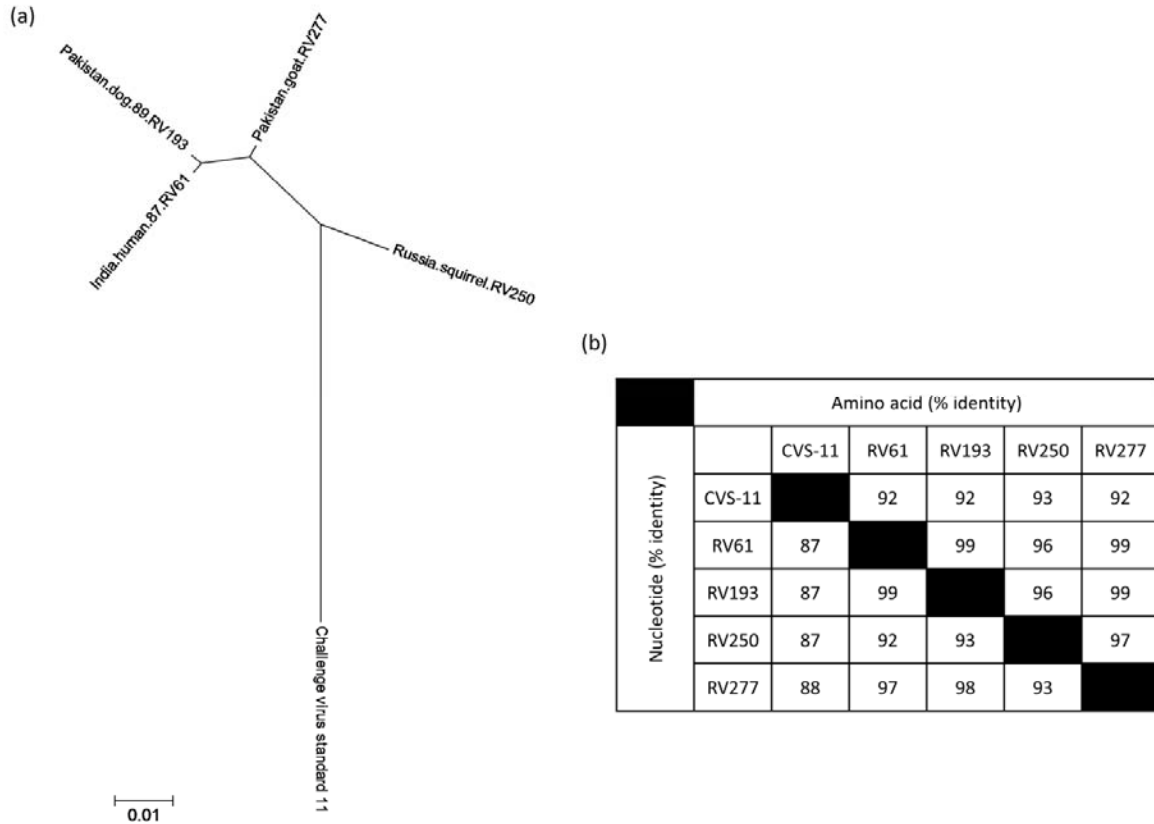

521

522 **Fig. 5. Degree of nucleotide and amino acid sequence identity between envelope glycoprotein etm**

523 **domains of the rabies virus isolates within this study.** (a) The radial phylogenetic tree scale corresponds to

524 amino acid substitutions per site. (b) Nucleotide and amino acid percentage identities are shown.

525



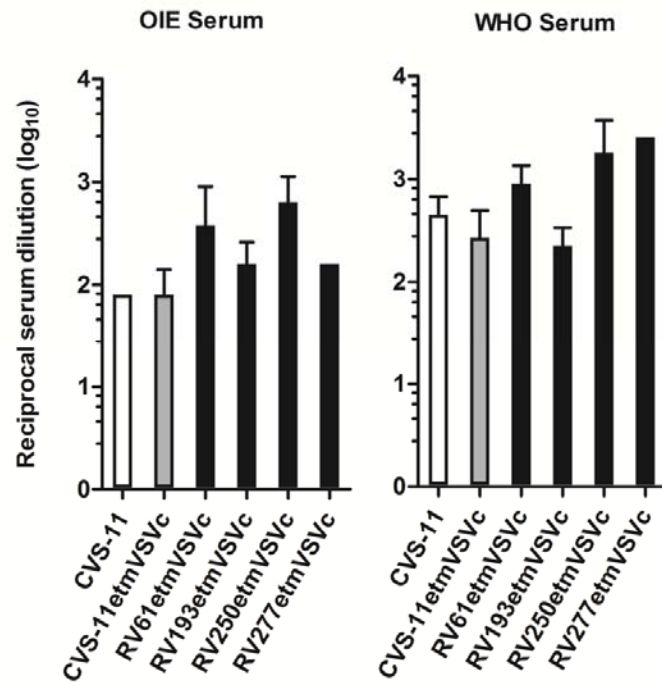

526

527 **Fig. 6. Neutralisation of PV by OIE and WHO serum standards.** The OIE is a standard reference dog serum  
528 at 0.5 IU/ml and the WHO is the 2<sup>nd</sup> international human anti-rabies Ig reference serum at 2 IU/ml. Values  
529 are reported as IC<sub>100</sub> endpoint reciprocal dilutions (geometric mean ± SD). Where error bars are absent,  
530 replicates produced the same IC<sub>100</sub> endpoint dilution.

531

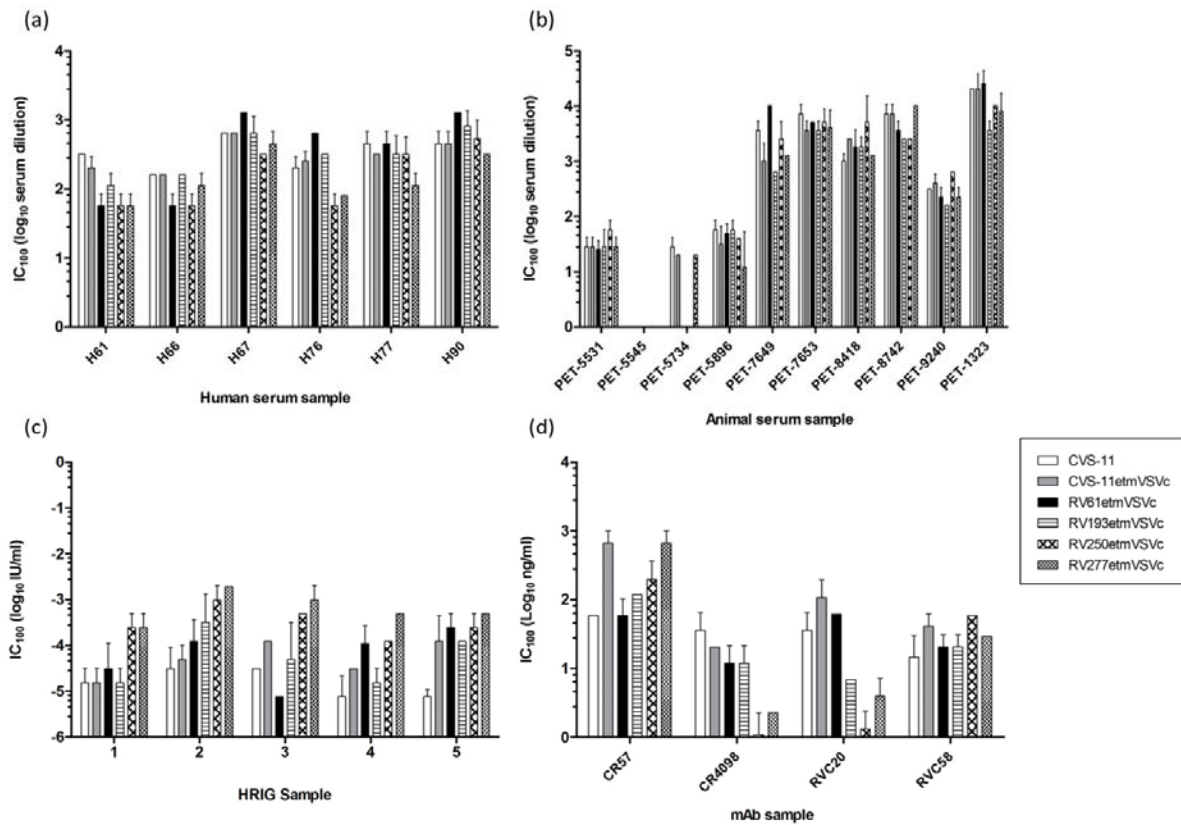

532

533 **Fig. 7. Neutralisation  $IC_{100}$  endpoint dilutions for human and animal serum samples, HRIG and mAb**

534 **samples are reported for CVS-11 and AL RABV G PV. (a) Human serum samples are from RABV vaccine**

535 recipients, sample H61 has a titre of 0.38 IU/ml and the remaining samples a titre > 0.5 IU/ml.  $IC_{100}$  values

536 are reported as reciprocal serum dilutions. (b) Animal serum samples are from vaccinated dogs or cats, four

537 samples with titres between 0.07 – 0.38 IU/ml (PET-5531,-5545,-5734,-5896) are shown. The remaining

538 samples have a titre > 0.5 IU/ml and  $IC_{100}$  values are reported as reciprocal serum dilutions. (c) HRIG

539 samples were tested with a starting concentration of 2 IU/ml. (d) mAb samples are derived against different

540 neutralising epitopes and were used at a starting concentration of 15  $\mu$ g/ml. All values are reported as the

541 geometric mean  $\pm$  SD and where error bars are absent, replicates produced the same  $IC_{100}$  endpoint

542 dilution.

543

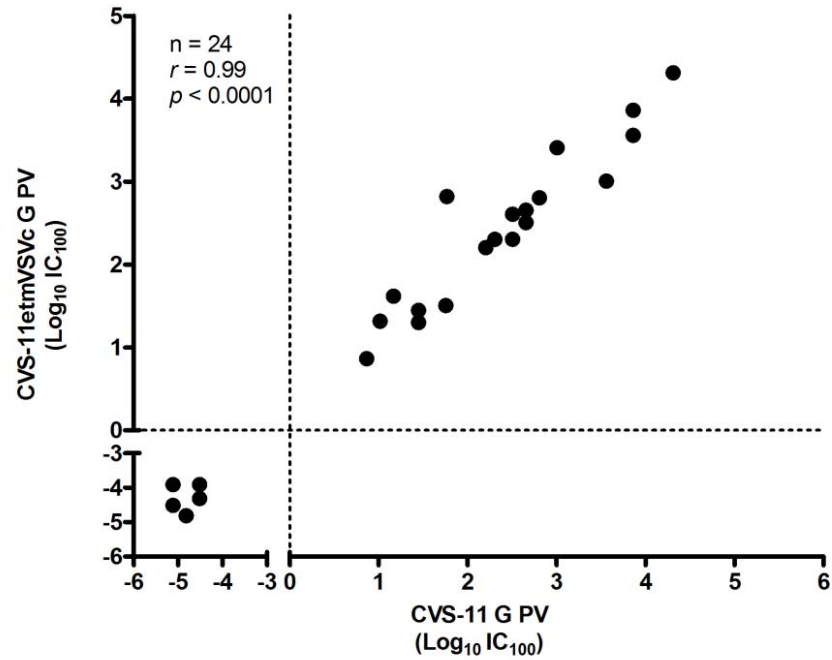

544

545 **Fig. 8. Comparison of the neutralisation  $IC_{100}$  endpoint for wildtype CVS-11 G PV compared to chimeric**

546 **CVS-11etmVSVc G PV.** A high correlation ( $r$ ) was observed. Pearson's product-moment correlation was

547 used to calculate  $r$  and  $p$  values.

548

549 **Table S1. Oligonucleotide primers used for PCR amplification and overlap extension PCR to create**  
 550 **chimeric envelope glycoprotein sequences.**

| <b>Glycoprotein Gene</b> | <b>Forward Primer (5' → 3')</b>          | <b>Reverse Primer (5' → 3')</b>          |
|--------------------------|------------------------------------------|------------------------------------------|
| CVS-11                   | GCGCGCGGTACCGCCACCATGGTTCCTCAAGT<br>TCTT | GCGCGCCTCGAGTTACAGTCTGATCTCACCTC         |
| RV61                     | GCGCGCGGTACCGCCACCATGGTTCCTCAAGT<br>TCTT | GCGCGCCTCGAGTCACAGTCTGGTCTCACC           |
| RV193                    | GCGCGCGGTACCGCCACCATGGTTCCTCAGGT<br>TCTT | GCGCGCCTCGAGTCACAGTCTGGTCTCACC           |
| RV250                    | GCGCGCGGTACCGCCACCATGGTTCCTCAAGC<br>TCTT | GCGCGCGAATTCTCACAGTCTGGTCTCACC           |
| RV277                    | GCGCGCGGTACCGCCACCATGGTTCCTCAGGT<br>TCTT | GCGCGCCTCGAGTCACAGTCTGGTCTCACC           |
| RV61etmCVS-11c           | RV61 forward                             | CVS-11 reverse                           |
| RV193etmCVS-11c          | RV193 forward                            | CVS-11 reverse                           |
| RV250etmCVS-11c          | RV250 forward                            | GAGCGCGAATTCTTACAGTCTGATCTCACCTC         |
| RV277etmCVS-11c          | RV277 forward                            | CVS-11 reverse                           |
| CVS-11etmVSVc            | CVS-11 forward                           | GATCATCTCGAGTTACTTTCCAAGTCGGTTCA         |
| RV61etmVSVc              | RV61 forward                             | GATCATCTCGAGTTACTTTCCAAGTCGGTTCA         |
| RV193etmVSVc             | RV193 forward                            | GATCATCTCGAGTTACTTTCCAAGTCGGTTCA         |
| RV250etmVSVc             | RV250 forward                            | GATCATGAATTCTTACTTTCCAAGTCGGTTCA         |
| RV277etmVSVc             | RV277 forward                            | GATCATCTCGAGTTACTTTCCAAGTCGGTTCA         |
|                          | <b>Internal Forward Primer (5' → 3')</b> | <b>Internal Reverse Primer (5' → 3')</b> |
| RV61etmCVS-11c           | ACATGTTGC AGAAGAGCCAAT                   | GGCTTTCT GCAACATGTTAT                    |
| RV193etmCVS-11c          | ACATGTTGC AGAAGAGCCAAT                   | GGCTTTCT GCAACATGTTAT                    |
| RV250etmCVS-11c          | GACATGTTGT AGAAGAGCCAA                   | GGCTTTCT ACAACATGTCATT                   |
| RV277etmCVS-11c          | ACATGTTGC AGAAGAGCCAAT                   | GGCTTTCT GCAACATGTCATT                   |
| CVS-11etmVSVc            | GACATGGTGC CGAGTTGGTATCCAT               | TACCAACTCG GCACCATGTCATTAG               |
| RV61etmVSVc              | AACATGTTGC CGAGTTGGTATCCAT               | TACCAACTCG GCAACATGTTATTATG              |
| RV193etmVSVc             | AACATGTTGC CGAGTTGGTATCCAT               | TACCAACTCG GCAACATGTTATTATG              |
| RV250etmVSVc             | GACATGTTGT CGAGTTGGTATCCAT               | TACCAACTCG ACAACATGTCATTAG               |
| RV277etmVSVc             | GACATGTTGC CGAGTTGGTATCCAT               | TACCAACTCG GCAACATGTCATTATG              |

551
